# Supplementary material
Source: PubMed Central journal article supplement (PMC3180738)
Supplement: tableS1.pdf [file tableS1.pdf]

**Supplemental Table 1: Primers for border mapping the 318 donor region**

| <b>Primer Name</b> | <b>Primer Sequence</b>  | <b>Chr. 7<br/>Location</b> | <b>318 congenic<br/>genotype</b> |
|--------------------|-------------------------|----------------------------|----------------------------------|
| D7B6C1-F           | TTCCTGTCTCCTTTGGGGTA    | 79110107                   | B6By (background)                |
| D7B6C1-R           | TCCAGATCCAGAGACACAGAA   | 79110417                   | B6By (background)                |
| D7B6C2-F           | TTATATCTGCCCCCATGCTC    | 79400293                   | B6By (background)                |
| D7B6C2-R           | GCAAGTGATGGTGTGTGGAC    | 79400497                   | B6By (background)                |
| D7B6C3-F           | CTGTGTGAACACGTGTCTAGAGG | 79710098                   | BALB/cByJ (congenic)             |
| D7B6C3-R           | CCTGTGTCAGGCAGATCAAA    | 79710320                   | BALB/cByJ (congenic)             |
| D7B6C4-F           | AAAGGGGGAGCAAAAGAGAG    | 81202253                   | BALB/cByJ (congenic)             |
| D7B6C4-R           | TGAAGACAACCTGGCAGTCC    | 81202514                   | BALB/cByJ (congenic)             |
| D7B6C5-F           | TTACCGAATGAGTGCACCTG    | 81559659                   | BALB/cByJ (congenic)             |
| D7B6C5-R           | AGAGTCACCAGCCAAGCCTA    | 81559863                   | BALB/cByJ (congenic)             |
| D7B6C6-F           | GCCTGCCAGACTCACCTACT    | 82232169                   | B6By (background)                |
| D7B6C6-R           | GAAGGGGGACAACATTTGAA    | 82232390                   | B6By (background)                |
| D7B6C7-F           | GCTGTCTCCTGACCATCACA    | 82247623                   | B6By (background)                |
| D7B6C7-R           | TCCAGGAATCATCCTGCTCT    | 82248062                   | B6By (background)                |

318 congenic borders were defined using primers that amplified microsatellite markers

that had variable repeats between C57BL/6ByJ and BALB/cByJ strains.
